# Supplementary material for: Effect of L- to D-Amino Acid Substitution on Stability and Activity of Antitumor Peptide RDP215 against Human Melanoma and Glioblastoma
Source: MDPI journal article supplement (doi:10.3390/ijms22168469), 2021-08-06
Supplement: s1 [file s1]

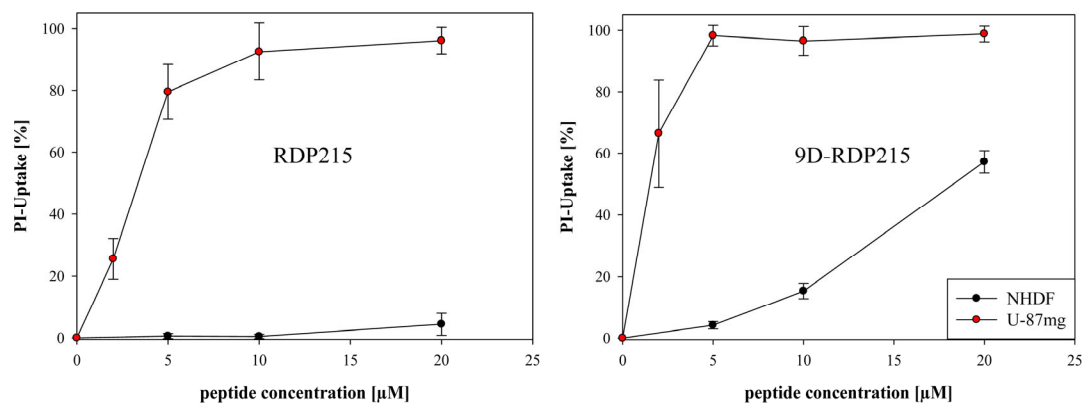

**Figure S5.** Cytotoxicity of RDP215 and 9D-RDP215 on glioblastoma cells U-87mg and healthy cells NHDF. Cell death was determined by PI-uptake (%) in presence of 2  $\mu$ M, 5  $\mu$ M, 10  $\mu$ M and 20  $\mu$ M peptide concentration after 8 hours of incubation. With U-87mg, RDP215 already displays high peptide induced cell death up to 80% at 5  $\mu$ M. Within the studied concentration range RDP215 exhibits no harm on NHDF cells. 9D-RDP215 shows increased antitumor and non-tumor toxicity, though still with high specificity. E.g., at 5  $\mu$ M the D-peptide exhibits about 30-fold higher killing of cancer cells than normal cells. Mean values represent data of at least three independent experiments.
