# Supplementary material for: Effect of L- to D-Amino Acid Substitution on Stability and Activity of Antitumor Peptide RDP215 against Human Melanoma and Glioblastoma
Source: MDPI journal article supplement (doi:10.3390/ijms22168469), 2021-08-06
Supplement: s1 [file s1]

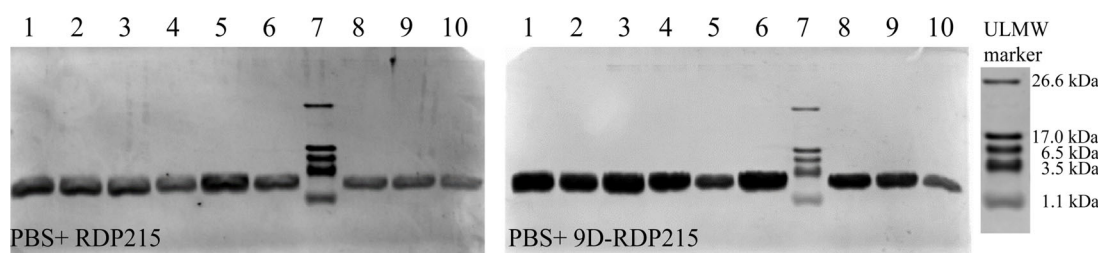

**Figure S1.** SDS-polyacrylamide gel electrophoresis of stability studies of RDP215 (left) and 9D-RDP215 (right) in presence in PBS (0% serum). Peptides (2.5 µg each) were incubated at 37°C for up to 7 days in presence of PBS. Lane 1-6: 2.5 µg of respective peptides were incubated in presence of PBS for 0 h (lane 1), 1 h (lane 2), 8 h (lane 3), 24 h (lane 4), 2 days (lane 5), and 7 days (lane 6). Molecular weights can be estimated from the ULMW marker (lane 7), fragment sizes are given on the right. Lane 8-10: 2.5 µg, 1 µg, and 0.5 µg respective peptide control. Presented data are representative for results of two independent measurements.
