# Supplementary material for: Effect of L- to D-Amino Acid Substitution on Stability and Activity of Antitumor Peptide RDP215 against Human Melanoma and Glioblastoma
Source: MDPI journal article supplement (doi:10.3390/ijms22168469), 2021-08-06
Supplement: s1 [file s1]

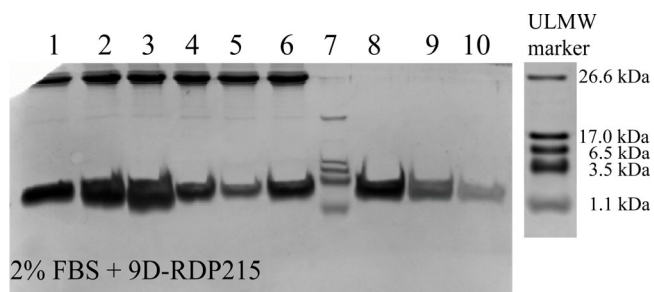

**Figure S2.** SDS-polyacrylamide gel electrophoresis of stability studies of 9D-RDP215 in presence of 2% fetal bovine serum (FBS). Peptide 9D-RDP215 (2.5 µg) was incubated at 37°C for up to 7 days in presence of 2% FBS, respectively. Lane 1-6: 2.5 µg respective peptide was incubated in presence of 2% FBS for 0 h (lane 1), 1 h (lane 2), 8 h (lane 3), 24 h (lane 4), 2 days (lane 5), and 7 days (lane 6). Molecular weights can be estimated from the ULMW marker (lane 7), fragment sizes are given on the right. Lane 8-10: 2.5 µg, 1 µg, and 0.5 µg respective peptide control. Presented data are representative for results of two independent measurements.
