# Supplementary material for: Effect of L- to D-Amino Acid Substitution on Stability and Activity of Antitumor Peptide RDP215 against Human Melanoma and Glioblastoma
Source: MDPI journal article supplement (doi:10.3390/ijms22168469), 2021-08-06
Supplement: s1 [file s1]

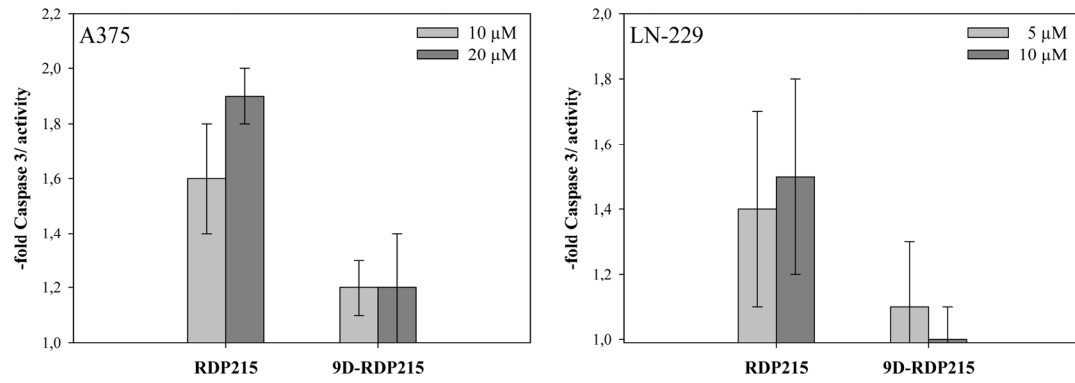

**Figure S4:** Left: Fold caspase-3/7 activity of melanoma cell line A375 after 4 h of incubation with 10 and 20  $\mu$ M of peptide RDP215 and 9D-RDP215 indicating increased killing by early apoptosis by RDP215 compared to the L-peptide. Right: Fold caspase-3/7 activity of glioblastoma cell line LN-229 after 2 h of incubation with 5 and 10  $\mu$ M of peptide RDP215 and 9D-RDP215 only indicating killing by early apoptosis by RDP215. Mean values represent data of at least three independent experiments.
